# Supplementary material
Source: publisher site journal article supplement (https://www.dovepress.com/article/574358)
Supplement: Supplementary file 1 [file 574358_Supplementary%20Material%20Table.docx]

Table S. Area under the ROC curve comparison of ACAG, Anion gap, and Albumin.

| Compare | ΔAUC | SE | Z | P* |
| --- | --- | --- | --- | --- |
| In-hospital mortality | | | | |
| ACAG vs Anion gap | 0.122 | 0.025 | 4.92 | <0.001 |
| ACAG vs Albumin | 0.053 | 0.031 | 1.73 | 0.083 |
| 30-day mortality | | | | |
| ACAG vs Anion gap | 0.106 | 0.023 | 4.62 | <0.001 |
| ACAG vs Albumin | 0.059 | 0.028 | 2.08 | 0.037 |
| *DeLong’s test. AUC: area under curve, ΔAUC: difference in AUC, SE: standard error. ACAG: albumin-corrected anion gap. | | | | |
